**Supplemental Table S1:** Impact of base quality score recalibration by Lacer and GATK on SNP calls from NA12878 chr19 (GATK HaplotypeCaller).

| Call Set                    | No. of SNPs |        | Ti/Tv |      |
|-----------------------------|-------------|--------|-------|------|
|                             | Lacer       | GATK   | Lacer | GATK |
| Raw reads, all calls        | 88,335      | 88,335 | 2.10  | 2.10 |
| Unique to raw read calls    | 813         | 1,462  | 0.69  | 0.64 |
| Unique to +recal/+LRA calls | 503         | 443    | 0.96  | 1.12 |
| +recal/+LRA, all calls      | 88,025      | 87,316 | 2.11  | 2.14 |
| Filtered by VQSR            | 17,155      | 16,107 | 1.57  | 1.64 |
| Final call set              | 70,870      | 71,209 | 2.28  | 2.28 |
| Unique to final call set    | 2,518       | 2,857  | 1.95  | 1.95 |

recal: recalibration; LRA: local realignment; VQSR: variant quality score recalibration
